# Supplementary material for: Cytokinin functions as an asymmetric and anti-gravitropic signal in lateral roots
Source: PubMed Central journal article supplement (PMC6684572; doi:10.1038/s41467-019-11483-4), 2019-08-06
Supplement: 41467_2019_11483_MOESM3_ESM.pdf [file 41467_2019_11483_MOESM3_ESM.pdf]

## **Description of Additional Supplementary Files**

File Name: Supplementary Data 1

Description: Accessions with their mean GSA distribution (compared to Col-0) used in this study.

File Name: Supplementary Data 2

Description: All GSA distributions presented in this work.

File Name: Supplementary Data 3

Description: Oligonucleotides used in this study.
